# Supplementary material for: Locally Downscaled and Spatially Customizable Climate Data for Historical and Future Periods for North America
Source: PLoS One. 2016 Jun 8;11(6):e0156720. doi: 10.1371/journal.pone.0156720 (PMC4898765; doi:10.1371/journal.pone.0156720)
Supplement: S1 File — (PDF) [file pone.0156720.s001.pdf]

## S1 File. Equations of derived climate variables

### The general piecewise function for degree-day variables:

$$DD_m = \begin{cases} \text{if } T_m > k, & \frac{a}{1+e^{-\left(\frac{T_m-T_0}{b}\right)}} \\ \text{if } T_m \leq k, & c + \beta T_m \end{cases}$$

Where,  $T_m$  is the monthly mean temperature for the  $m$  month;  $k$ ,  $a$ ,  $b$ ,  $T_0$ ,  $c$  and  $\beta$  are the six parameters to be optimized. This general piecewise function applies to degree-days below 0°C ( $DD < 0$ ), degree-days above 5°C ( $DD > 5$ ), degree-days below 18°C ( $DD < 18$ ) and degree-days above 18°C ( $DD > 18$ ). Estimated parameters and results of model fit can be found in S1 – S4 Tables.

### Number of frost-free days (NFFD)

The general function for monthly NFFD ( $NFFD_m$ ) is:

$$NFFD_m = \frac{a}{1+e^{-\left(\frac{T_m-T_0}{b}\right)}}$$

where,  $T_m$  is the monthly minimum temperature for the  $m$  month;  $a$ ,  $b$  and  $T_0$  are the three parameters to be optimized. Estimated parameters and results of model fit can be found in S5 Table.

### Frost-free period (FFP), the day of the year on which FFP begins (bFFP) and the day of the year on which FFP ends (eFFP)

$$bFFP = 352.1358994 + -0.021715653 * T_{min}(4)^2 + -3.542187618 * T_{min}(6) + 0.020359471 * T_{min}(6)^2 - 4.897998097 * TD + 0.033521327 * TD^2 - 2.164862277 *$$

$$\text{NFFD} + 0.006767633 * \text{NFFD}^2 - 0.00000929 * \text{NFFD}^3 + 0.043516586 * (\text{TD} * \text{NFFD}) - 0.00000253 * (\text{TD} * \text{NFFD})^2$$

$$\begin{aligned} eFFP = & 243.7752209 + 4.134210825 * \text{Tmin}(9) - 0.162876448 * \text{Tmin}(9)^2 + \\ & 1.248649021 * \text{Tmin}(10) + 0.145073612 * \text{Tmin}(10)^2 + 0.004319892 * \text{Tmin}(11) + - \\ & 0.005753127 * \text{Tmin}(11)^2 - 0.06296471 * \text{NFFD} + 0.000399177 * \text{NFFD}^2 \end{aligned}$$

$$\text{FFP} = e\text{FFP} - b\text{FFP}$$

where Tmin is the monthly minimum temperature, TD is difference between the mean warmest monthly temperature and the mean coldest monthly temperature, and NFFD is the number of frost-free days.

## Precipitation as snow (PAS)

The general function for monthly PAS ( $PAS_m$ ) is

$$PAS_m = \frac{1}{1 + e^{-\left(\frac{T_m - T_0}{b}\right)}}$$

Where,  $T_m$  is the monthly minimum temperature for the  $m$  month;  $b$  and  $T_0$  are the three parameters to be optimized. Estimated parameters and results of model fit can be found in S6 Table.

## Extreme minimum temperature (EMT) and extreme maximum temperature (EXT)

$$\text{EMT} = -23.02164 + 0.77908 * \text{Tmin}(1) + 0.67048 * \text{Tmin}(12) + 0.01075 * \text{TminX}^2 + 0.11565 * \text{TD}$$

$$\begin{aligned} \text{EXT} = & 10.64245 + -1.92005 * \text{Tmax}(7) + 0.04816 * \text{Tmax}(7)^2 + 2.51176 * \text{Tmax}(8) - \\ & 0.03088 * \text{Tmax}(8)^2 - 0.01311 * \text{TmaxX}^2 + 0.33167 * \text{TD} - 0.001 * \text{TD}^2 \end{aligned}$$

where  $T_{min}$  is the monthly minimum temperature,  $T_{max}$  is the monthly maximum temperature,  $T_{maxX}$  is the maximum  $T_{max}$  over the year, and  $TD$  is difference between the mean warmest monthly temperature and the mean coldest monthly temperature.

## **Relative humidity (RH)**

Monthly average relative humidity (RH %) is calculated from the monthly maximum and minimum air temperature following [21]:

$$RH = 100 * es(T_{min}) / es(avg)$$
$$es(avg) = [es(T_{min}) + es(T_{max})] / 2$$

where  $es(T_{min})$  and  $es(T_{max})$  are the saturated vapour pressure (kPa) at the monthly mean minimum and maximum air temperature ( $^{\circ}C$ ), respectively, and  $es(avg)$  is the monthly average saturation vapour pressure (kPa). The Tetens' equation is used to calculate the saturated vapour pressure ( $SVP(T)$  kPa) as a function of temperature ( $T$   $^{\circ}C$ ).

$$SVP(T) \text{ (kPa)} = 0.6105 * \exp([17.273 * T] / [T + 237.3])$$
$$\text{For } T \geq 0^{\circ}C \quad es(T) = SVP(T)$$
$$\text{For } T < 0^{\circ}C \quad es(T) = SVP(T) * (1 + [T * 0.01])$$

This method will slightly overestimate the daily average relative humidity in dry environments where the nighttime relative humidity does not approach 100%.
