# Supplementary material for: Locally Downscaled and Spatially Customizable Climate Data for Historical and Future Periods for North America
Source: PLOS journal article supplement (doi:10.1371/journal.pone.0156720), 2016-06-08
Supplement: S2 (10.1371/journal.pone.0156720.s002) [file journal.pone.0156720.s002]

S1 Table. Parameters and the results of the model fit for monthly Degree-days below 0°C (DD < 0).

| Month | k    | a        | b       | T <sub>0</sub> | $\beta$  | c   | Sigma | R <sup>2</sup> |
|-------|------|----------|---------|----------------|----------|-----|-------|----------------|
| 1     | -9   | 381.2279 | -5.4630 | -3.59          | -30.7664 | 5   | 8.4   | 0.998          |
| 2     | -10  | 357.1408 | -5.6865 | -3.60          | -27.7799 | 5   | 7.9   | 0.996          |
| 3     | -9.5 | 358.7336 | -4.9692 | -3.31          | -30.8261 | 5   | 7.9   | 0.993          |
| 4     | -7   | 274.6697 | -3.5915 | -2.68          | -29.5144 | 10  | 4.5   | 0.992          |
| 5     | -5   | 169.7686 | -1.2282 | -1.85          | -29.0289 | 20  | 1.2   | 0.997          |
| 6     |      | 167.0972 | -2.1215 | -1.95          |          |     | 0.5   | 0.958          |
| 7*    |      | 134.2072 | -1.5400 | -1.75          |          |     |       |                |
| 8     |      | 101.3172 | -0.9553 | -1.56          |          |     | 0.2   | 0.899          |
| 9     | -4.5 | 262.5633 | -3.9104 | -2.33          | -32.6652 | -20 | 0.5   | 0.997          |
| 10    | -6.5 | 246.0955 | -2.8570 | -2.47          | -30.2925 | 10  | 2.2   | 0.994          |
| 11    | -7.5 | 280.4533 | -3.5609 | -2.84          | -29.5002 | 10  | 6.1   | 0.993          |
| 12    | -10  | 403.6482 | -5.9513 | -3.60          | -30.7232 | 5   | 7.6   | 0.997          |

\* Averaged between June and August as no parameters estimated.

## Degree-days above 5°C (DD5)

Table S2. Parameters and the results of the model fit for the piecewise function for monthly Degree-days above 5°C.

| Region | Month | k  | a        | b       | T <sub>0</sub> | $\beta$ | c    | Sigma | R <sup>2</sup> |
|--------|-------|----|----------|---------|----------------|---------|------|-------|----------------|
| All    | 1     | 12 | 337.5699 | 10.0241 | 3.36           | 30.0966 | -140 | 7.6   | 0.986          |
|        | 2     | 12 | 302.8633 | 10.0060 | 3.31           | 28.0429 | -140 | 7.5   | 0.988          |
|        | 3     | 12 | 363.8180 | 10.5024 | 3.44           | 30.1222 | -140 | 10.3  | 0.991          |
|        | 4     | 12 | 339.8059 | 10.3516 | 3.26           | 29.4187 | -140 | 7.4   | 0.997          |
|        | 5*    | 12 | 327.1587 | 10.0530 | 2.79           | 30.1473 | -140 | 3.6   | 0.999          |
|        | 6*    | 13 | 370.5585 | 11.1296 | 3.13           | 29.9647 | -150 | 2.2   | 1.000          |
|        | 7*    | 15 | 410.0218 | 11.6278 | 3.12           | 30.7456 | -150 | 1.7   | 1.000          |
|        | 8*    | 15 | 412.2794 | 11.6613 | 3.13           | 30.7429 | -150 | 1.6   | 1.000          |
|        | 9*    | 13 | 342.8546 | 10.5144 | 2.96           | 29.7243 | -145 | 2.1   | 1.000          |
|        | 10*   | 12 | 344.9987 | 10.2648 | 3.19           | 30.4110 | -145 | 5.0   | 0.999          |
|        | 11    | 11 | 304.7169 | 9.5882  | 3.15           | 29.4263 | -140 | 7.0   | 0.995          |
|        | 12    | 12 | 341.0866 | 10.0869 | 3.29           | 30.1269 | -140 | 7.0   | 0.990          |
| West   | 1     | 12 | 299.5106 | 9.6754  | 2.58           | 29.8768 | -140 | 4.3   | 0.997          |
|        | 2     | 12 | 250.6012 | 9.2207  | 2.42           | 27.9937 | -140 | 5.0   | 0.997          |
|        | 3     | 12 | 318.4976 | 10.0133 | 2.63           | 30.0353 | -140 | 6.3   | 0.997          |
|        | 4     | 12 | 308.1068 | 10.0143 | 2.75           | 29.3949 | -140 | 5.9   | 0.998          |
|        | 11    | 12 | 322.3119 | 10.2178 | 2.85           | 29.3400 | -140 | 5.0   | 0.998          |
|        | 12    | 12 | 289.4347 | 9.4137  | 2.55           | 30.0054 | -140 | 4.9   | 0.996          |
| East   | 1     | 12 | 295.5816 | 8.7948  | 3.29           | 30.1798 | -140 | 4.0   | 0.996          |
|        | 2     | 12 | 283.2021 | 9.3056  | 3.44           | 28.0894 | -140 | 3.9   | 0.996          |
|        | 3     | 12 | 308.5948 | 9.1350  | 3.34           | 30.1602 | -140 | 6.5   | 0.996          |
|        | 4     | 12 | 309.8332 | 9.6150  | 3.13           | 29.4255 | -140 | 5.9   | 0.998          |
|        | 11    | 12 | 309.4319 | 9.5599  | 3.26           | 29.4366 | -140 | 5.0   | 0.997          |
|        | 12    | 12 | 326.1452 | 9.5931  | 3.39           | 30.1914 | -140 | 3.8   | 0.997          |

\* Region specific model is not necessary.

## Degree-days below 18°C (DD\_18)

Table S3. Parameters and the results of the model fit for the piecewise function for monthly Degree-days below 18°C.

| Month | k    | a        | b       | T <sub>0</sub> | $\beta$  | c   | Sigma | R <sup>2</sup> |
|-------|------|----------|---------|----------------|----------|-----|-------|----------------|
| 1     | 11   | 342.1497 | 12.7839 | -3.19          | -30.7428 | 560 | 2.9   | 1.000          |
| 2     | 11   | 344.9851 | 12.0296 | -3.29          | -28.0059 | 500 | 2.9   | 1.000          |
| 3     | 11   | 325.8230 | 13.1044 | -2.99          | -30.9798 | 560 | 3.0   | 1.000          |
| 4     | 10   | 325.2590 | 12.9908 | -2.92          | -29.8772 | 540 | 3.7   | 0.999          |
| 5     | 10   | 311.8766 | 13.3935 | -2.76          | -30.9508 | 558 | 5.3   | 0.998          |
| 6     | 12.5 | 220.3158 | 14.7742 | -2.34          | -29.9192 | 540 | 4.0   | 0.996          |
| 7*    | 13   | 210.8181 | 14.8316 | -2.01          | -31.1228 | 560 | 3.2   | 0.994          |
| 8     | 14   | 184.0869 | 15.4483 | -2.01          | -31.0299 | 560 | 4.3   | 0.992          |
| 9     | 11   | 298.2082 | 13.3674 | -2.87          | -29.9141 | 540 | 6.1   | 0.995          |
| 10    | 11   | 308.4115 | 13.4294 | -2.83          | -31.1362 | 560 | 4.1   | 0.999          |
| 11    | 11   | 320.2009 | 13.0114 | -3.07          | -29.9279 | 540 | 3.2   | 1.000          |
| 12    | 11   | 353.3562 | 12.6101 | -3.28          | -30.9299 | 555 | 3.2   | 1.000          |

## Degree-days above 18°C (DD18)

Table S4. Parameters and the results of the model fit for the piecewise function for monthly Degree-days above 18°C.

| Region        | Month | k    | a        | b       | T <sub>0</sub> | $\beta$ | c    | Sigma | R <sup>2</sup> |
|---------------|-------|------|----------|---------|----------------|---------|------|-------|----------------|
| All           | 1     | 35   | 252.4909 | 21.4798 | 2.68           | 0.0000  | 0    | 1.4   | 0.949          |
|               | 2     | 35   | 154.5938 | 19.8062 | 2.27           | 0.0000  | -220 | 1.4   | 0.940          |
|               | 3     | 22   | 218.9100 | 20.9740 | 2.63           | 26.5492 | -450 | 2.4   | 0.969          |
|               | 4     | 23   | 262.9456 | 22.1931 | 2.91           | 28.4619 | -500 | 3.1   | 0.988          |
|               | 5     | 23   | 270.0578 | 22.1579 | 2.84           | 28.6688 | -500 | 4.5   | 0.993          |
|               | 6*    | 21   | 154.5632 | 19.7346 | 2.01           | 28.8946 | -510 | 4.1   | 0.998          |
|               | 7*    | 22   | 181.7177 | 20.5247 | 1.83           | 30.7090 | -550 | 3.3   | 0.999          |
|               | 8*    | 22   | 190.7156 | 20.6291 | 1.98           | 30.7189 | -550 | 4.4   | 0.998          |
|               | 9*    | 24   | 255.1446 | 21.7683 | 2.65           | 29.2723 | -520 | 5.8   | 0.994          |
|               | 10    | 23   | 236.9956 | 21.3134 | 2.59           | 28.7088 | -500 | 3.8   | 0.989          |
|               | 11    | 21   | 159.6297 | 19.5192 | 2.33           | 24.0432 | -400 | 2.5   | 0.967          |
|               | 12    | 21   | 144.0946 | 18.9260 | 2.37           | 24.2537 | -400 | 1.5   | 0.955          |
| South<br>west | 1     | 35   | 194.5122 | 17.7804 | 1.09           | 0.0000  | 0    | 0.5   | 0.997          |
|               | 2     | 35   | 142.9417 | 19.5130 | 1.59           | 0.0000  | -220 | 0.9   | 0.976          |
|               | 3     | 22   | 83.1831  | 17.6914 | 1.45           | 20.5749 | -300 | 1.8   | 0.979          |
|               | 4     | 23   | 173.0118 | 20.0616 | 1.94           | 28.4684 | -500 | 2.9   | 0.991          |
|               | 5     | 23   | 215.0754 | 20.9080 | 2.10           | 28.7549 | -500 | 5.5   | 0.993          |
|               | 10    | 23   | 226.2045 | 21.2092 | 2.13           | 28.7587 | -500 | 4.6   | 0.992          |
|               | 11    | 18   | 77.4705  | 16.6507 | 1.24           | 18.6903 | -280 | 7.1   | 0.966          |
|               | 12    | 21.9 | 148.7235 | 18.9921 | 1.82           | 17.3182 | -250 | 4.2   | 0.985          |
| The<br>rest   | 1     | 35   | 204.2576 | 20.8281 | 2.95           | 0.0000  | 0    | 0.8   | 0.980          |
|               | 2     | 18   | 71.9182  | 16.7546 | 2.22           | 14.8919 | -220 | 0.7   | 0.987          |
|               | 3     | 20   | 203.7113 | 20.7024 | 2.78           | 21.9203 | -350 | 1.6   | 0.987          |
|               | 4     | 23   | 282.6539 | 22.6475 | 3.08           | 28.4613 | -500 | 2.4   | 0.992          |
|               | 5     | 23   | 272.4801 | 22.2227 | 2.91           | 28.6468 | -500 | 3.8   | 0.995          |
|               | 10    | 23   | 215.8640 | 20.7702 | 2.55           | 28.6914 | -500 | 2.8   | 0.994          |
|               | 11    | 20   | 157.7828 | 19.8833 | 2.55           | 20.6859 | -330 | 1.6   | 0.960          |
|               | 12    | 17   | 63.0808  | 15.4078 | 2.11           | 14.2700 | -200 | 0.8   | 0.969          |

\* Region specific model is not necessary.

## Number of frost-free days (NFFD)

The general function for monthly NFFD ( $NFFD_m$ ) is:

$$NFFD_m = \frac{a}{1 + e^{-\left(\frac{T_m - T_0}{b}\right)}}$$

where,  $T_m$  is the monthly minimum temperature for the  $m$  month;  $a$ ,  $b$  and  $T_0$  are the three parameters to be optimized.

Table S5. Parameters and the results of the model fit for monthly Number of frost-free days.

| Month | a       | b      | $T_0$ | Sigma | $R^2$ |
|-------|---------|--------|-------|-------|-------|
| 1     | 31.9203 | 0.9570 | 3.82  | 0.7   | 0.991 |
| 2     | 29.4221 | 1.0269 | 3.80  | 0.6   | 0.992 |
| 3     | 31.9966 | 0.8957 | 3.60  | 0.8   | 0.993 |
| 4     | 30.4145 | 0.6998 | 3.13  | 0.9   | 0.987 |
| 5     | 31.2379 | 0.6002 | 2.78  | 0.8   | 0.958 |
| 6     | 30.0053 | 0.3895 | 2.24  | 0.3   | 0.962 |
| 7     | 30.9517 | 0.6556 | 1.23  | 0.2   | 0.923 |
| 8     | 30.9461 | 0.3299 | 1.71  | 0.2   | 0.949 |
| 9     | 30.1120 | 0.5857 | 2.72  | 0.5   | 0.955 |
| 10    | 31.5968 | 0.6504 | 3.23  | 0.8   | 0.978 |
| 11    | 30.5354 | 0.8838 | 3.47  | 0.7   | 0.992 |
| 12    | 31.3262 | 0.8329 | 3.63  | 0.8   | 0.989 |

**Frost-free period (FFP), the day of the year on which FFP begins (bFFP) and the day of the year on which FFP ends (eFFP)**

$$\begin{aligned} bFFP = & 352.1358994 + -0.021715653 * Tmin(4)^2 + -3.542187618 * Tmin(6) + \\ & 0.020359471 * Tmin(6)^2 - 4.897998097 * TD + 0.033521327 * TD^2 - 2.164862277 * \\ & NFFD + 0.006767633 * NFFD^2 - 0.00000929 * NFFD^3 + 0.043516586 * (TD * NFFD) - \\ & 0.00000253 * (TD * NFFD)^2 \end{aligned}$$

$$\begin{aligned} eFFP = & 243.7752209 + 4.134210825 * Tmin(9) - 0.162876448 * Tmin(9)^2 + \\ & 1.248649021 * Tmin(10) + 0.145073612 * Tmin(10)^2 + 0.004319892 * Tmin(11) + - \\ & 0.005753127 * Tmin(11)^2 - 0.06296471 * NFFD + 0.000399177 * NFFD^2 \end{aligned}$$

$$FFP = eFFP - bFFP$$

where Tmin is the monthly minimum temperature, TD is difference between the mean warmest monthly temperature and the mean coldest monthly temperature, and NFFD is the number of frost-free days.

## Precipitation as snow (PAS)

The general function for monthly PAS ( $PAS_m$ ) is

$$PAS_m = \frac{1}{1 + e^{-\left(\frac{T_m - T_0}{b}\right)}}$$

Where,  $T_m$  is the monthly minimum temperature for the  $m$  month;  $b$  and  $T_0$  are the three parameters to be optimized.

Table S6. Parameters and the results of the model fit for monthly precipitation as snow.

| Month | b       | T <sub>0</sub> | Sigma | R <sup>2</sup> |
|-------|---------|----------------|-------|----------------|
| 1     | -4.1625 | -2.5114        | 0.13  | 0.796          |
| 2     | -2.6996 | -1.7031        | 0.13  | 0.804          |
| 3     | -1.7860 | -1.2583        | 0.07  | 0.728          |
| 4     | 1.7672  | -1.4152        | 0.05  | 0.641          |
| 5     | 1.4390  | -2.2797        | 0.01  | 0.325          |
| 6*    | 1.4390  | -2.2797        |       |                |
| 7*    | 2.3201  | -2.1302        |       |                |
| 8*    | 3.2012  | -1.9808        |       |                |
| 9     | 3.2012  | -1.9808        | 0.01  | 0.308          |
| 10    | 2.3486  | -1.4464        | 0.03  | 0.686          |
| 11    | -1.6709 | -1.4617        | 0.05  | 0.853          |
| 12    | -3.0127 | -1.5327        | 0.12  | 0.823          |

\* No parameters can be determined due to extreme small amount of snow fall in these months.

The parameters for May were used for June, the parameters for September were used for August, and the averages between May and September were used for July.

## **Extreme minimum temperature (EMT) and extreme maximum temperature (EXT)**

$$EMT = -23.02164 + 0.77908 * T_{min}(1) + 0.67048 * T_{min}(12) + 0.01075 * T_{minX}^2 + 0.11565 * TD$$

$$EXT = 10.64245 + -1.92005 * T_{max}(7) + 0.04816 * T_{max}(7)^2 + 2.51176 * T_{max}(8) - 0.03088 * T_{max}(8)^2 - 0.01311 * T_{maxX}^2 + 0.33167 * TD - 0.001 * TD^2$$

where  $T_{min}$  is the monthly minimum temperature,  $T_{max}$  is the monthly maximum temperature,  $T_{maxX}$  is the maximum  $T_{max}$  over the year, and  $TD$  is difference between the mean warmest monthly temperature and the mean coldest monthly temperature.



## Relative humidity (RH)

Monthly average relative humidity (RH %) is calculated from the monthly maximum and minimum air temperature following [21]:

$$RH = 100 * es(T_{min}) / es(avg)$$
$$es(avg) = [es(T_{min}) + es(T_{max})] / 2$$

where  $es(T_{min})$  and  $es(T_{max})$  are the saturated vapour pressure (kPa) at the monthly mean minimum and maximum air temperature ( $^{\circ}C$ ), respectively, and  $es(avg)$  is the monthly average saturation vapour pressure (kPa). The Tetens' equation is used to calculate the saturated vapour pressure (SVP(T) kPa) as a function of temperature ( $T$   $^{\circ}C$ ).

$$SVP(T) \text{ (kPa)} = 0.6105 * \exp([17.273 * T] / [T + 237.3])$$
$$\text{For } T \geq 0^{\circ}C \quad es(T) = SVP(T)$$
$$\text{For } T < 0^{\circ}C \quad es(T) = SVP(T) * (1 + [T * 0.01])$$

This method will slightly overestimate the daily average relative humidity in dry environments where the nighttime relative humidity does not approach 100%.
